# Supplementary material
Source: PubMed Central journal article supplement (PMC4668239)
Supplement: NIHMS691063-supplement-Revised_Supp_FigureS1___TableS1-S7.pdf [file NIHMS691063-supplement-Revised_Supp_FigureS1___TableS1-S7.pdf]

**Figure 1S**

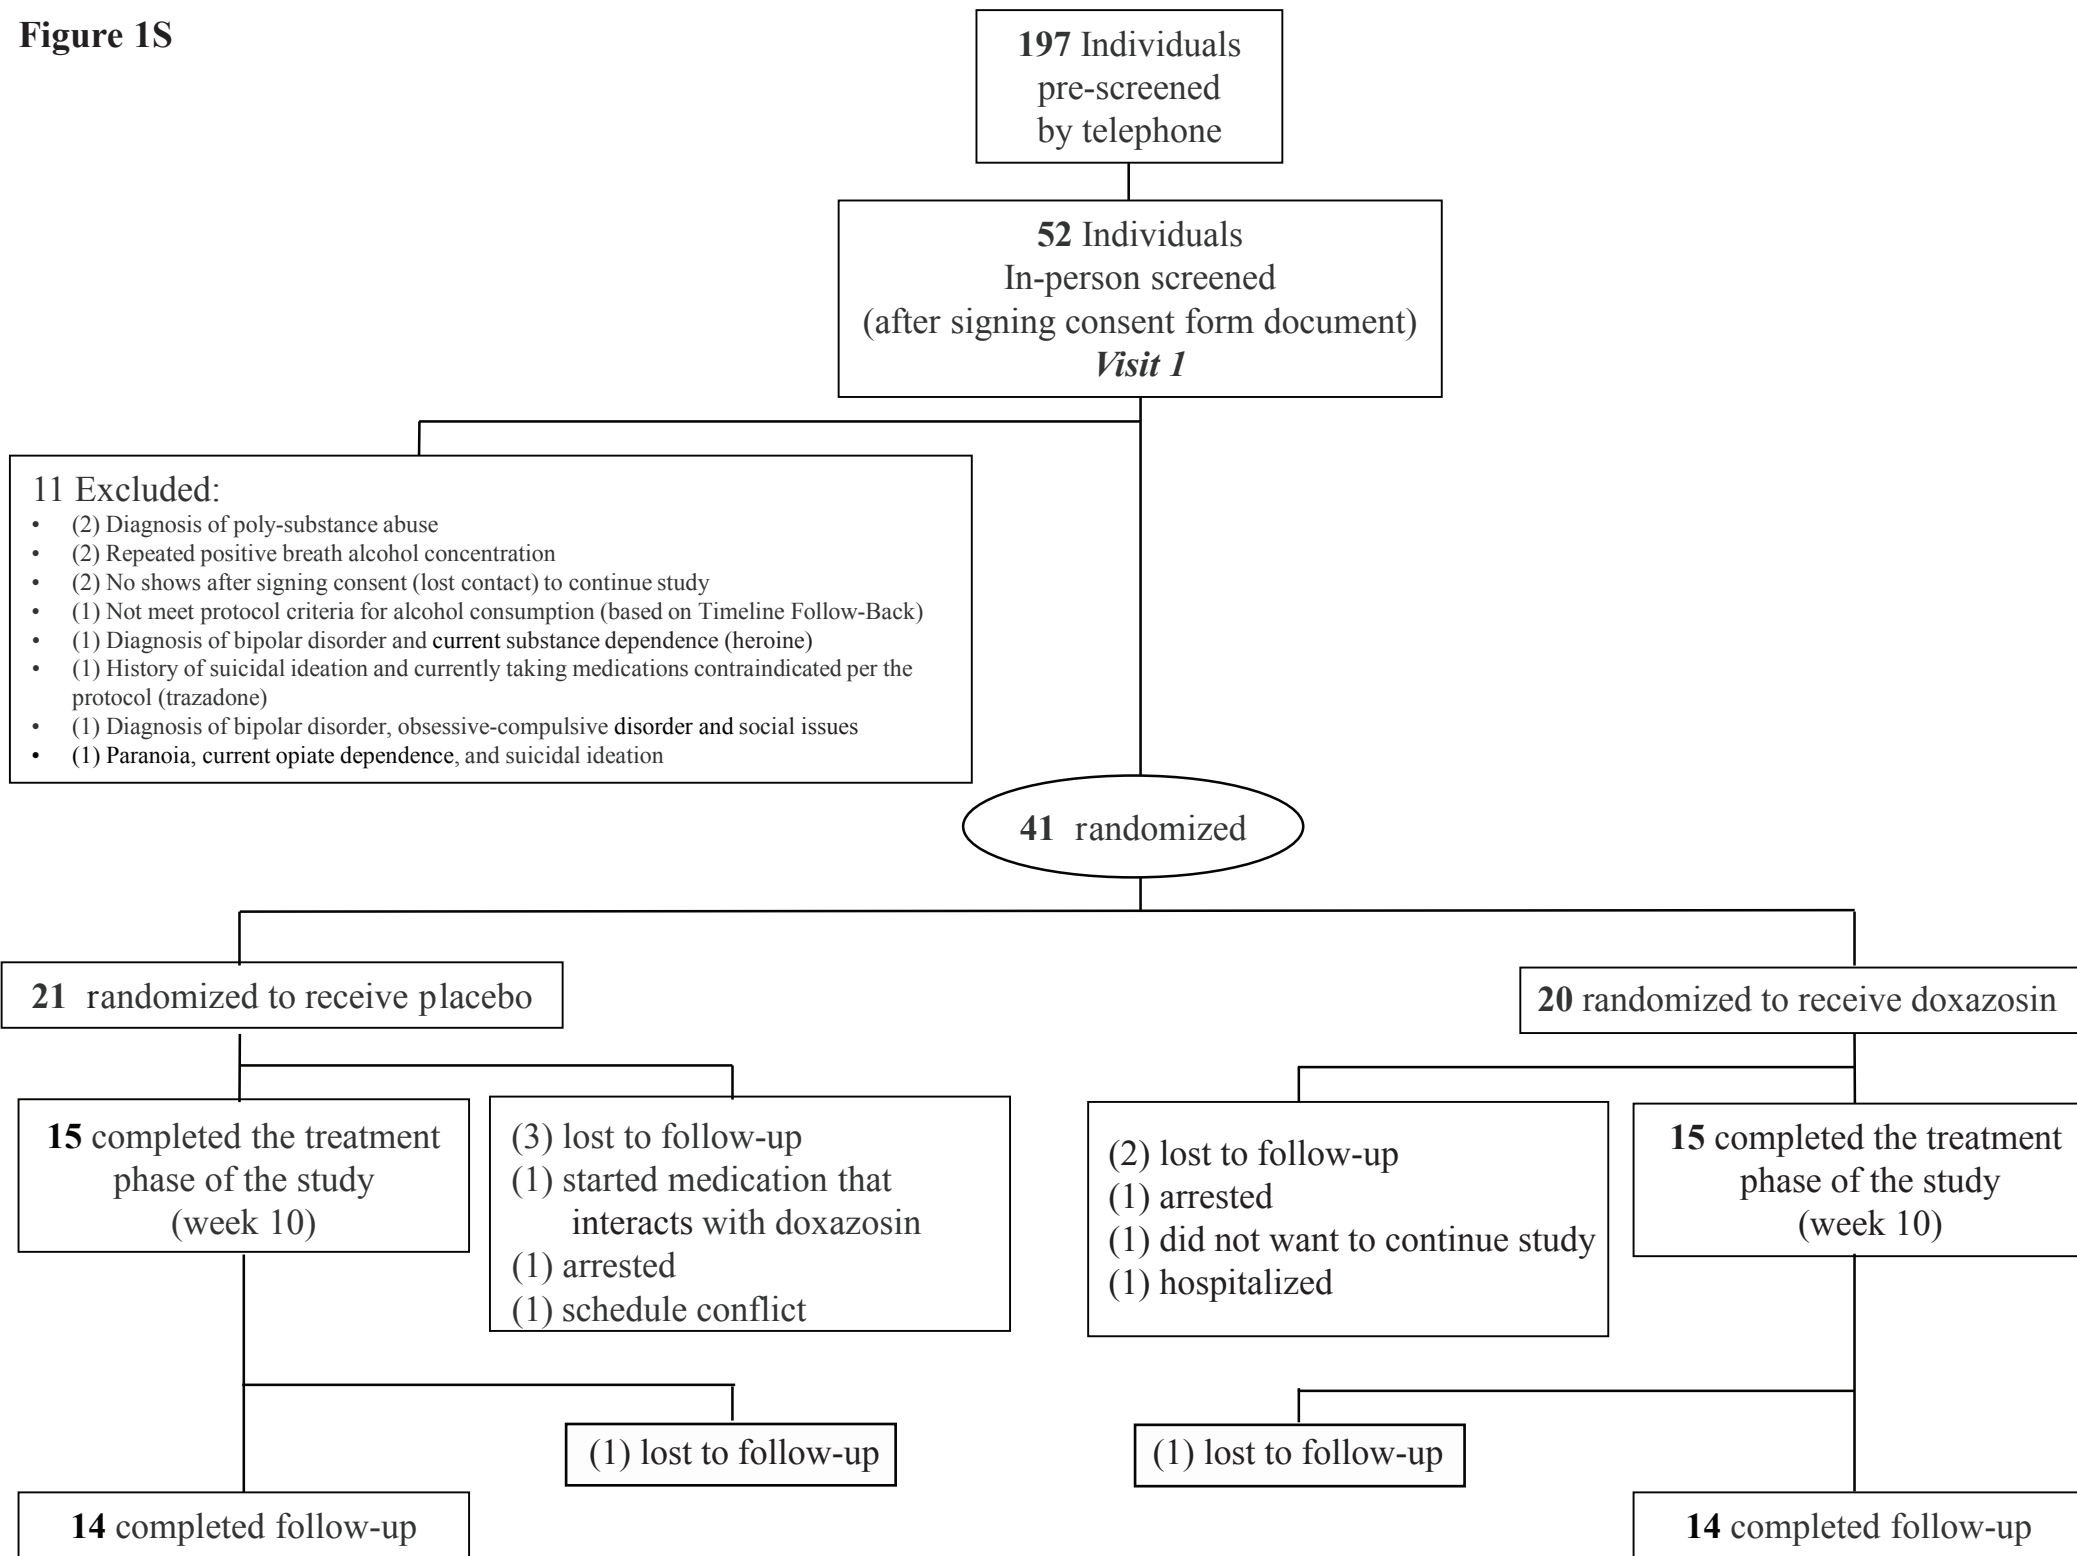

## SUPPLEMENTAL INFORMATION

**Table 1S. Inclusion and Exclusion Criteria**

| Inclusion Criteria                                                                                                                                                                                                   | Exclusion Criteria                                                                                                                                                                                                                    |
|----------------------------------------------------------------------------------------------------------------------------------------------------------------------------------------------------------------------|---------------------------------------------------------------------------------------------------------------------------------------------------------------------------------------------------------------------------------------|
| Age $\geq 18$                                                                                                                                                                                                        | Females who were of child bearing potential and not practicing effective birth control                                                                                                                                                |
| Females had to be post-menopausal for $>1$ year, surgically sterile, or practicing a birth control before entry and throughout the study; have a negative urine pregnancy test at screening and before randomization | Lifetime DSM-IV diagnosis of schizophrenia, bipolar disorder, or other psychosis                                                                                                                                                      |
| Good health (confirmed by medical history, physical, ECG, blood/urine labs)                                                                                                                                          | Recent (past six months) DSM-IV diagnosis of any anxiety disorder or major depression                                                                                                                                                 |
| Diagnosis of AD based on the Structured Clinical Interview for Diagnostic and Statistical Manual of Mental Disorders, Fourth Edition (DSM-IV) Patient Version                                                        | In the investigators' opinion, risk of suicide (e.g. active plan, or recent attempt in last year)                                                                                                                                     |
| Average of $\geq 4$ drinks/day for women and $\geq 5$ drinks/day for men during 30 days within the 90 days prior to screening                                                                                        | DSM-IV diagnosis of dependence on any psychoactive substance other than alcohol, nicotine and/or marijuana (given the high comorbidity with alcoholism and our goal to provide a proof-of-concept study in a 'real world' population) |
| Desire to reduce or quit alcohol drinking                                                                                                                                                                            | Positive urine screen for any substance other than marijuana                                                                                                                                                                          |
|                                                                                                                                                                                                                      | History of hospitalization for alcohol intoxication delirium, seizure or alcohol withdrawal delirium                                                                                                                                  |
|                                                                                                                                                                                                                      | Clinical Institute Withdrawal Assessment for Alcohol score $\geq 10$<br>Treatment with disulfiram, naltrexone, acamprosate, topiramate within 1 month prior to screening                                                              |
|                                                                                                                                                                                                                      | Current use of psychotropic medications or drugs that interfere with doxazosin's metabolism                                                                                                                                           |
|                                                                                                                                                                                                                      | Use of phosphodiesterase (PDE5) inhibitor erectile dysfunction drugs                                                                                                                                                                  |
|                                                                                                                                                                                                                      | Treatment with any antihypertensive drug and/or any $\alpha$ -blocker for BPH or sleep problems                                                                                                                                       |
|                                                                                                                                                                                                                      | Baseline hypotension                                                                                                                                                                                                                  |
|                                                                                                                                                                                                                      | History of allergy to any $\alpha$ -blocker                                                                                                                                                                                           |
|                                                                                                                                                                                                                      | Contraindications to taking doxazosin (history of fainting and/or syncopal attacks, heart failure, significant liver diseases)                                                                                                        |
|                                                                                                                                                                                                                      | Serious illnesses, e.g. kidney failure, epilepsy                                                                                                                                                                                      |

**Table 2S. Drug Titration Schedule**

| <b>Week(s)</b> | <b>Day(s)</b> | <b>Daily Dose (mg)</b> |
|----------------|---------------|------------------------|
| 1              | 1-7           | 1                      |
| 2              | 8-14          | 2                      |
|                | 15-17         | 4                      |
| 3              | 18-19         | 6                      |
|                | 20-21         | 8                      |
|                | 22-24         | 10                     |
| 4              | 25-26         | 12                     |
|                | 27-28         | 14                     |
| 5-10           | 29-70         | 16                     |
|                | 71            | 14                     |
|                | 72            | 12                     |
|                | 73            | 10                     |
| 11             | 74            | 8                      |
|                | 75            | 4                      |
|                | 76            | 2                      |
|                | 77            | 1                      |
| 12             | 78-84         | -                      |

**Table 3S.** Adverse Events (AEs) as frequency percentage (%)

| <b>AE</b>                                  | <b>Doxazosin</b> | <b>Placebo</b> |
|--------------------------------------------|------------------|----------------|
| Dizziness (*)                              | 45               | 14             |
| Decrease in appetite                       | 10               | 19             |
| Increase in appetite                       | 25               | 10             |
| Changes in vision                          | 25               | 5              |
| Difficulty Sleeping                        | 40               | 33             |
| Slowness, sleepiness, or fatigue           | 50               | 48             |
| Difficulty with coordination or balance    | 10               | 5              |
| Difficulty with concentration or attention | 30               | 19             |
| Tingling in fingers or toes                | 15               | 19             |
| Word finding difficulties                  | 0                | 10             |
| Memory difficulties                        | 10               | 10             |
| Change in taste                            | 0                | 14             |
| Tremor                                     | 55               | 48             |
| Constipation                               | 5                | 5              |
| Diarrhea                                   | 10               | 24             |
| Nausea                                     | 15               | 19             |
| Vomiting                                   | 10               | 10             |
| Headache (**)                              | 50               | 10             |
| Restlessness                               | 35               | 19             |
| Nervousness or Anxiety, irritability       | 65               | 52             |
| Depression or other mood disturbance (*)   | 35               | 10             |
| Confusion                                  | 0                | 10             |
| Changes in Libido, impotence               | 5                | 19             |
| Slowed breathing                           | 5                | 5              |
| Hyperventilation                           | 10               | 0              |
| Trouble waking up                          | 25               | 5              |
| Trouble breathing                          | 20               | 14             |
| Stupor                                     | 10               | 5              |
| Skin rash, itching, cellulitis             | 25               | 14             |
| Trouble urinating# (*)                     | 20               | 0              |
| Palpitations                               | 20               | 5              |
| Swelling of face or edema                  | 10               | 0              |
| Osteomuscular pain                         | 25               | 24             |
| Eye pain, twitch                           | 5                | 5              |
| Flu-like symptoms                          | 20               | 14             |
| Peripheral symptoms                        | 5                | 5              |
| Other GI symptoms                          | 20               | 10             |
| Calmness                                   | 5                | 0              |

*Unless otherwise noted, percentages of AEs were not different across groups ( $p$ 's > .05)  
(\*)  $p$  < .05; (\*\*)  $p$  < .01 (#reported by females as frequent passing urine).*

**Table 4S.** Blood Pressure Changes (BPΔ) [ $M \pm (SE)$ ]

|               | <b>Doxazosin</b>                                             | <b>Placebo</b> |                           |
|---------------|--------------------------------------------------------------|----------------|---------------------------|
|               | <i>entire 10-week treatment period</i>                       |                |                           |
| Systolic BPΔ  | 3.6 (1.3)                                                    | 3.1 (1.3)      | $F_{1,34} = .07, p = .80$ |
| Diastolic BPΔ | -2.2 (1.2)                                                   | -2.8 (1.2)     | $F_{1,37} = .14, p = .71$ |
|               | <i>treatment period with the 4-week grace period applied</i> |                |                           |
| Systolic BPΔ  | 4.8 (1.7)                                                    | 3.9 (1.7)      | $F_{1,32} = .16, p = .70$ |
| Diastolic BPΔ | -2.4 (1.4)                                                   | -2.2 (1.5)     | $F_{1,33} = .01, p = .93$ |

**Table 5S.** Full Models for Drinking Outcomes

|                   | <u>DPW</u>              | <u>HDD</u>              |
|-------------------|-------------------------|-------------------------|
| Medication        | F(1,36) = 0.43, p = .52 | F(1,35) = 1.03, p = .32 |
| Time              | F(5,30) = 1.73, p = .16 | F(5,33) = 1.23, p = .32 |
| Medication X Time | F(5,30) = 0.43, p = .82 | F(5,33) = 0.76, p = .58 |

**Table 6S.** Full Models for Craving

|                   | <u>OCDS</u>             | <u>ODS</u>               | <u>CDS</u>              |
|-------------------|-------------------------|--------------------------|-------------------------|
| Medication        | F(1,35) = 2.55, p = .12 | F(1,33) = 4.92, p = .034 | F(1,36) = 0.87, p = .36 |
| Time              | F(2,29) = 0.43, p = .65 | F(2,32) = 0.41, p = .67  | F(2,30) = 1.40, p = .26 |
| Medication X Time | F(2,29) = 0.28, p = .76 | F(2,32) = 0.64, p = .54  | F(2,30) = 0.05, p = .95 |

**Table 7S.** Full Models for Anxiety and Stress

|                   | <u>HAMA</u>             | <u>PSS</u>              | <u>POMS-TA</u>          |
|-------------------|-------------------------|-------------------------|-------------------------|
| Medication        | F(1,36) = 0.46, p = .50 | F(1,36) = 0.30, p = .59 | F(1,34) = 0.34, p = .56 |
| Time              | F(2,32) = 0.98, p = .39 | F(2,20) = 0.84, p = .45 | F(2,33) = 1.13, p = .34 |
| Medication X Time | F(2,32) = 2.28, p = .12 | F(2,20) = 0.81, p = .46 | F(2,33) = 2.37, p = .11 |
